1 Pleiotropic effects of mutations in the effector domain of influenza A virus NS1 protein

2

3 Carina F. Pereira<sup>1†</sup>, Helen M. Wise<sup>1,2†</sup>, Dominic Kurian<sup>2</sup>, Rute M. Pinto<sup>2</sup>, Maria J. Amorim<sup>1,3</sup>,  
4 Andrew C. Gill<sup>2, 4</sup> and Paul Digard<sup>1,2#</sup>

5

6 <sup>1</sup>Division of Virology, Department of Pathology, University of Cambridge, Tennis Court Road,  
7 Cambridge, CB2 1QP, UK.

8 <sup>2</sup>The Roslin Institute, University of Edinburgh, Easter Bush, Midlothian EH25 9RG, UK.

9 <sup>3</sup>Cell Biology of Viral Infection, Instituto Gulbenkian de Ciência, *Rua da Quinta Grande 6*, P-  
10 2780-156 Oeiras, Portugal.

11 <sup>4</sup>School of Chemistry, Joseph Banks Laboratories, University of Lincoln, Green Lane, Lincoln,  
12 Lincolnshire LN6 7DL

13

14 ‡Present address: European Commission, Place Rogier 16, B-1210, Brussels, Belgium

15 †Present address: Department of Engineering and Physical Sciences, Heriot Watt University,  
16 Edinburgh, UK.

17

18

19

20

21

22

23 #Corresponding author: Paul Digard

24 Tel: +44 131 651 9240

25 Fax: +44 131 651 9105

26 Email [paul.digard@roslin.ed.ac.uk](mailto:paul.digard@roslin.ed.ac.uk)

27

28 Other author email addresses:

29

30 CFP: [carina.pereira@ec.europa.eu](mailto:carina.pereira@ec.europa.eu)

31 HMW: [h.wise@hw.ac.uk](mailto:h.wise@hw.ac.uk)

32 RMP: [s1564909@sms.ed.ac.uk](mailto:s1564909@sms.ed.ac.uk)

33 DK: [Dominic.Kurian@roslin.ed.ac.uk](mailto:Dominic.Kurian@roslin.ed.ac.uk)

34 MJA: [mjamorim@igc.gulbenkian.pt](mailto:mjamorim@igc.gulbenkian.pt)

35 ACG: [angill@lincoln.ac.uk](mailto:angill@lincoln.ac.uk)

36

37

38

39

40

41

42

43

44

45

46

47

48

49 **Abstract**

50

51 Objective: The multifunctional NS1 protein of influenza A virus has roles in antagonising  
52 cellular innate immune responses and promoting viral gene expression. To better  
53 understand the interplay between these functions, we tested the effects of NS1 effector  
54 domain mutations known to affect homo-dimerisation or interactions with cellular PI3  
55 kinase or Trim25 on NS1 ability to promote nuclear export of viral mRNAs.

56

57 Results: The NS1 dimerisation mutant W187R retained the functions of binding cellular  
58 NXF1 as well as stabilising NXF1 interaction with viral segment 7 mRNAs and promoting  
59 their nuclear export. Two PI3K-binding mutants, NS1 Y89F and Y89A still bound NXF1 but no  
60 longer promoted NXF1 interactions with segment 7 mRNA or its nuclear export. The Trim25-  
61 binding mutant NS1 E96A/E97A bound NXF1 and supported NXF1 interactions with segment  
62 7 mRNA but no longer supported mRNA nuclear export. Analysis of WT and mutant NS1  
63 interaction partners identified hsp70 as specifically binding to NS1 E96A/E97A. Whilst these  
64 data suggest the possibility of functional links between NS1's effects on intracellular  
65 signalling and its role in viral mRNA nuclear export, they also indicate potential pleiotropic  
66 effects of the NS1 mutations; in the case of E96A/E97A possibly via disrupted protein folding  
67 leading to chaperone recruitment.

68

69 **Keywords:** influenza A virus, NS1, PI3K, Trim25, RIG-I, nuclear export

70

71

## 72 **Introduction**

73

74 Influenza A virus (IAV) infects both man and animals, including species important for food  
75 security [1]. A better understanding of its replication cycle is important to aid control  
76 measures. Like all viruses, IAV co-opts multiple cellular systems for replication and also has  
77 to counteract innate immune defence mechanisms. A key virally-encoded factor in both  
78 processes is the NS1 protein. As a nuclear-replicating virus, IAV utilises the NXF1 cellular  
79 mRNA export pathway to direct several of its mRNAs to the cytoplasm [2] and we and  
80 others have recently found that NS1 acts as an adaptor between segment 7 mRNAs  
81 (encoding the M1 or M2 proteins) and cellular mRNA processing/export pathways [3, 4].  
82 NS1 is also the primary viral antagonist of innate immune responses, interfering with the  
83 function of multiple cellular polypeptides including PKR, 2'-OAS, CPSF30 and Trim25 [5]. NS1  
84 also activates the phosphoinositide 3-kinase (PI3K) complex, possibly to inhibit apoptosis  
85 [6]. Structurally, NS1 consists of an N-terminal RNA-binding domain and a C-terminal  
86 “effector” domain followed by a disordered tail, with no identified enzymatic activities.  
87 Instead, it functions by binding to multiple different proteins and RNAs (viral and cellular)  
88 and altering their activities [5]. Various NS1 point mutations have been identified that  
89 inhibit these interactions and comparative analyses of the behaviour of wild type (WT) and  
90 mutant IAV strains with these alterations have provided important information on the  
91 biological significance of each particular function. Here, we tested whether mutations  
92 identified as affecting NS1 interactions with the p85 $\beta$  subunit of PI3K (Y89A and Y89F),  
93 Trim25 (E96A/E97A) and NS1 effector domain-mediated oligomerisation (W187R) [7-11]  
94 also affected NS1’s ability to promote nuclear export of segment 7 viral mRNAs.

95

96

97 **Methods.**

98 All IAV plasmid constructs and viruses were based on the A/PR/8/34 (PR8) strain described  
99 previously [12]. NS1 mutations used in this study were introduced by standard PCR  
100 mutagenesis reactions; primer sequences are available on request. Methods for virus  
101 reverse genetics, infection, minireplicon assays, fluorescent *in situ* hybridization (FISH),  
102 immunofluorescence and confocal microscopy, GFP-trap pulldowns, western blots and  
103 reverse transcriptase-radioactive primer extension are described elsewhere [4]. LC-MS  
104 analysis was performed using a RSLCnano system (Thermo Fisher Scientific) coupled to a  
105 micrOTOF QII mass spectrometer (Bruker) on in-gel trypsin digested protein bands excised  
106 from Coomassie Blue-stained SDS-PAGE gels [13]. Raw spectral data were processed to peak  
107 lists and searched using Mascot 2.4 server (Matrix Science) against the Uniprot Human  
108 sequence database containing 93,786 entries.

109

110 **Results.**

111 Our previous work led to the hypothesis of NS1 acting as an adaptor protein to feed  
112 viral segment 7 mRNA(s) into the cellular NXF1 export pathway, by forming a ternary  
113 complex between NS1, NXF1 and the mRNA that requires both the NS1 effector domain and  
114 a functional RNA-binding domain [4]. To further test the role of the NS1 effector domain, a  
115 set of point mutations in this region of the protein were tested (Table 1), firstly in a subviral  
116 “minireplicon” system. 293T cells were transfected with plasmids to produce segment 7  
117 ribonucleoproteins (RNPs) as well as with either WT or mutant NS1s as EGFP-fusion  
118 proteins. Cells were fixed 24 h post transfection and segment 7 mRNA localisation detected

119

120 **Table 1. Genetic and phenotypic summary of the NS1 polypeptides used in this study.**

| NS1 protein              | mRNA export | NXF1 binding | M1 mRNA binding | Functional alteration    | Reference |
|--------------------------|-------------|--------------|-----------------|--------------------------|-----------|
| WT                       | +           | +            | +               | n/a                      | [12]      |
| N81 <sup>a,b</sup>       | -           | -            | -               | Effector domain deletion | [14]      |
| R38A/K41A <sup>b</sup>   | -           | -            | -               | dsRNA-binding            | [15]      |
| F103S/M106I <sup>b</sup> | +           | +            | +               | Gain of CPSF inhibition  | [16]      |
| Y89A                     | -           | +            | -               | PI3K-binding             | [17]      |
| Y89F                     | -           | +            | -               | PI3K-binding             | [8]       |
| E96A/97A                 | -           | +            | +               | Trim25-binding           | [9]       |
| W187R                    | +           | +            | +               | Homo-dimerisation        | [11]      |

121 <sup>a</sup>Stop codon added at position 82. <sup>b</sup>See [4] for experimental data.

122

123 by FISH (**Figure 1A**). NS1 expression was confirmed by detection of GFP signal as well as by  
124 western blot, although the E96A/E97A mutant accumulated to lower levels than the other  
125 NS1s (**Figure 1B**). WT NS1-GFP and most mutant proteins localised largely to the cytoplasm,  
126 but the W187R mutant was found both in nucleus and cytoplasm (**Figure 1A**). No mRNA  
127 staining was detected in the negative control lacking a complete RNP. As expected [4],  
128 when the minimal components for RNP reconstitution were present, segment 7 mRNA was  
129 detected primarily in cell nuclei, whilst on addition of NS1-GFP, it translocated to the  
130 cytoplasm. However, in the presence of PI3K-binding mutants NS1-Y89A or NS1-Y89F or the  
131 Trim25-binding mutant NS1-E96A/E97A, segment 7 mRNA was clearly still retained in the  
132 nucleus. In contrast, the dimerization mutant NS1-W187R caused segment 7 mRNA to  
133 localise to the cytoplasm. To quantify these effects, cells were visually scored according to  
134 the predominant cellular localisation of segment 7 mRNA (nuclear, cytoplasmic or both). In  
135 the absence of NS1, segment 7 was mainly nuclear in ~80% of cells scored, while the  
136 remaining cells presented mRNA staining both in the nucleus and the cytoplasm (**Figure 1C**).  
137 When WT NS1 or NS1-W187R were added, a statistically significant shift of segment 7 mRNA  
138 localisation was confirmed, with ~ 75% of cells showing mRNA in the cytoplasm. However,

139 addition of NS1-E96A/E97A, NS1-Y89A or NS1-Y89F did not produce this shift, with a clear  
140 majority of cells displaying nuclear segment 7 mRNA, similarly to samples with no NS1-GFP.

141 To further test the mRNA export activity of the NS1 effector domain mutants, their  
142 phenotype was examined in the context of virus infection. 293T cells were mock infected or  
143 infected with either WT PR8 or the NS1 mutant viruses and at 6 h post infection (p.i.), fixed  
144 and processed for segment 7 FISH analysis as well as immunofluorescently stained for NS1  
145 (**Figure 1D**). All viruses generally gave cytoplasmic NS1 signal above the uninfected cell  
146 background, although staining of cells infected with NS1-Y89 and NS1-E96A/E97A mutants  
147 was noticeably fainter than the WT and W187R viruses. No viral mRNA signal was detected  
148 in the mock sample while segment 7 mRNA was cytoplasmic in WT and W187R virus-  
149 infected cells. In cells infected with NS1-Y89A, NS1-Y89F and NS1-E96A/E97A, segment 7  
150 mRNA was predominantly nuclear. Thus, in both minireplicon and viral settings, the NS1  
151 dimerization mutant W187R supported normal segment 7 mRNA nuclear export, but the  
152 PI3K-binding and Trim25-binding mutants showed loss-of-function.

153 NS1 both binds NXF1 and promotes the ability of NXF1 to bind segment 7 mRNA [4,  
154 18-20]. To test whether the effector domain mutants retained NXF1-binding activity, 293T  
155 cells were transfected with either GFP or GFP-NXF1 and 48 h later mock infected or infected  
156 with the panel of viruses. At 6 h p.i., cells were lysed and GFP-Trap precipitations were  
157 performed on the supernatants. Western blot analyses of total and bound fractions showed  
158 that GFP and GFP-NXF1 were both expressed and collected in comparable amounts (**Figure**  
159 **2A**). Blotting for NS1 confirmed successful infection, although the NS1-E96A/E97A  
160 polypeptide again accumulated to lower levels than the other NS1s. Nevertheless, all NS1  
161 polypeptides co-precipitated with GFP-NXF, indicating that the mutations did not abrogate  
162 the interaction.

163 To test whether the effector domain mutations affected the ability of NS1 to  
164 promote a stable interaction between NXF1 and segment 7 mRNA, 293T cells were  
165 transfected with GFP or GFP-NXF1 and infected with WT or mutant viruses as above. At 6 h  
166 p.i., cells were lysed and total RNA was extracted before or after the lysates had been  
167 subjected to GFP-Trap pulldown. Segment 7 RNA species were then detected by primer  
168 extension. Viral mRNAs and genomic vRNA were detected in the total fraction of every  
169 infected sample (**Figure 2B**, lanes 1-2 and 4-7). Analysis of the bound fraction from WT virus  
170 infected cells showed that both segment 7 mRNA species but not genomic vRNA co-  
171 precipitated with GFP-NXF1 (lane 9) while no viral RNAs bound to GFP alone (lane 8),  
172 consistent with previous work [4, 18]. In contrast, viral mRNAs were not detected in GFP-  
173 NXF1 pulldowns from cells infected with either NS1-Y89A or NS1-Y89F viruses (lanes 11 and  
174 12). The NS1-W187R and -E96A/E97A mutants also supported NXF1 interactions with the  
175 viral mRNAs (lane 13, 14). Since the E96A/E97A mutation blocked successful nuclear export  
176 of segment 7 mRNA, this finding indicated that, like the interaction between NS1 and NXF1,  
177 the interaction between NXF1 and segment 7 is necessary, but not sufficient for the  
178 successful nuclear export of segment 7 mRNA.

179 The behaviour of the NS1 E96A/E97A mutant – unable to mediate nuclear export of  
180 segment 7 mRNA despite binding to NXF1 and promoting its interaction with the mRNA –  
181 suggested the involvement of another essential factor in the hypothesised ternary export  
182 complex. Accordingly, we examined cellular interaction partners of WT NS1 and the  
183 mutants, including a complete deletion of the effector domain (NS1-N81), an RNA-binding  
184 domain mutant (R38A/K41A) and a gain-of-function mutant that restores CPSF30-binding  
185 activity (F103S/M106I), of which only the latter supported mRNA nuclear export (Table 1;  
186 [4]). 293T cells were transfected with GFP or GFP-tagged NS1 mutant plasmids. Two days

187 later, cells were collected, lysed and subjected to GFP-Trap. Bound fractions were loaded  
188 onto SDS-PAGE gels and stained with Coomassie Blue. No obvious contamination from  
189 cellular GFP-binding proteins was seen from cells transfected with the GFP control plasmid  
190 (**Figure 2C**, lane 1). Major polypeptide species of the expected size were detected in all  
191 other samples, including the truncated form NS1-N81, confirming successful expression  
192 (lanes 2-9). Various other minor polypeptide species were also visible that were mostly  
193 common to all NS1-containing samples. However, one clear difference was observed; a  
194 distinct novel polypeptide in the E96A/E97A preparation (lane 8) that was absent from  
195 other samples. LC-MS analysis of the excised band unambiguously identified this  
196 polypeptide as heat shock protein 70 (hsp70) through multiple peptide matches (**Table S1**).

197 To confirm the interaction between NS1-E96A/E97A and hsp70, repeat GFP-trap  
198 pulldowns were analysed by western blotting for hsp70 as well as for the GFP-tagged “bait”  
199 proteins. Transfection was confirmed by the detection of GFP and GFP-tagged NS1 mutant  
200 proteins, while equivalent amounts of the cellular proteins hsp70, Nup62 and UAP56 in the  
201 total fractions of all samples confirmed that comparable amounts of cell lysates had been  
202 generated (**Figure 2D**, lanes 1-9). However, in the bound fraction, hsp70 was detected only  
203 in the NS1-E96A/E97A sample (lane 17), confirming the specific interaction with hsp70 for  
204 NS1 E96A/E97A.

205

## 206 **Discussion**

207 The data reported here extend our previous investigation [4] into the role of NS1 in  
208 facilitating nuclear export of viral mRNA. Firstly, we show that higher order multimerization  
209 of NS1 via its effector domain is not needed for viral mRNA nuclear export. Secondly, the  
210 finding that point mutations in the NS1 effector domain, and not just its complete deletion



211 along with the C-terminal unstructured region [4], can block viral mRNA nuclear export,  
212 strengthens the argument for the functional involvement of this domain in the process.  
213 Thirdly, identification of an NS1 mutant (E96A/E97A) that still binds NXF1 and enhances its  
214 interaction with segment 7 mRNA without upregulating mRNA nuclear export suggests that  
215 at least one other factor is needed for export. Finally, the effect of mutations previously  
216 considered to specifically inhibit PI3K activation or inhibition of RIG-I signalling on M1 mRNA  
217 localisation could suggest the involvement of one or both of these pathways in viral mRNA  
218 nuclear export.

219 Of broader significance than the mechanism of IAV mRNA nuclear export, our data  
220 add to the evidence suggesting pleiotropic effects from NS1 mutations commonly used as  
221 tools to interrogate viral interactions with the PI3K and RIG-I pathways (*e.g.* [10, 17, 21-  
222 28]). Potential pleiotropic effects of the E96A/E97A mutation have been noted previously,  
223 including poor expression of the polypeptide as seen here [25] and an intriguing effect on  
224 PI3K activation [29]. Indeed a recent report detailing the crystal structure of NS1-Trim25  
225 complexes concluded that NS1 residues E96 and 97 do not directly contact Trim25 but  
226 instead support a network of contacts within the local region of the effector domain in  
227 which L95 and S99 actually make contact with Trim25 [30]. Our finding that the E96A/E97A  
228 mutation also induces binding of hsp70 further suggests effects on protein folding and that  
229 interpreting results obtained with this mutation may be complicated.

230

### 231 **Limitations**

232 Attempts to probe the role of PI3K activation in IAV mRNA export using small molecule  
233 inhibitors gave inconsistent results (data not shown) and could not be further pursued  
234 because of time and funding constraints. It would also have been interesting to test the

235 effects of hsp70 inhibitors [31] had time allowed. The effect of NS1 mutations L95A/S99A on  
236 mRNA export should also be tested.

237

## 238 **Declarations**

239 **Ethics approval and consent to participate:** not applicable.

240 **Availability of data and material:** available from the corresponding author on reasonable  
241 request.

242 **Funding:** PD, ACG, DK and HW were supported by grants BBS/E/D/20241864 and  
243 BBS/E/D/20002173 from the British Biotechnology and Biological Sciences Research Council.  
244 CFP was supported by PhD studentship no. SFRH/BD/60299/2009 from the Portuguese  
245 Fundação para a Ciência e a Tecnologia. MJA was supported by grant no. IF/00899/2013  
246 from the Portuguese Fundação para a Ciência e a Tecnologia and the Fundação Calouste  
247 Gulbenkian. RMP acknowledges PhD studentship support from the Roslin Institute. None of  
248 the funding bodies had any role in directing or interpreting the research.

249 **Acknowledgements:** we thank Professor Adrian Whitehouse for the gift of pGFP-NXF1.

250 **Consent for publication:** not applicable.

251 **Competing interests:** none to declare.

252 **Author's contributions:** CFP carried out the majority of the experimental work with input  
253 from MJA, HW and RMP. DK and ACG performed the LC-MS analyses. CFP and PD drafted  
254 the manuscript and all authors read, corrected and approved the final manuscript.

255

256

257

258

259

260 **Figures and Legends**

261

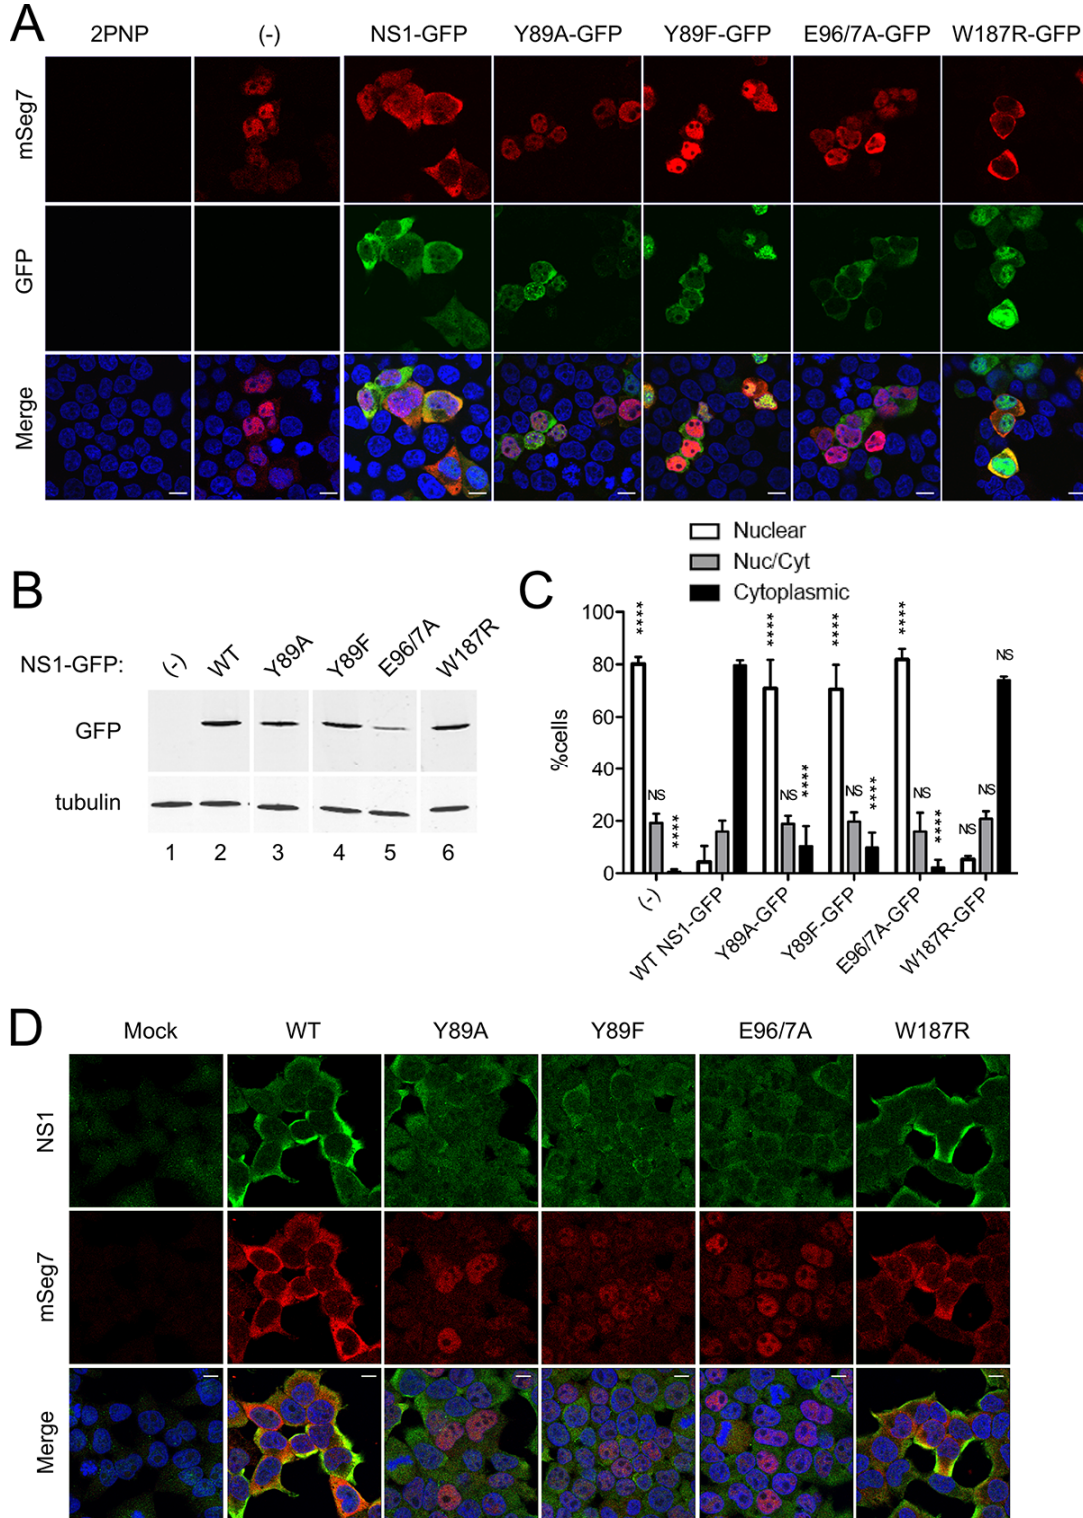

262

263

264

265

**Figure 1. Effect of mutations in the NS1 effector domain on segment 7 mRNA localisation.**

A-C) 293T cells were transfected with plasmids to recreate segment 7 RNPs or, as a negative

266 control with a combination that excluded a plasmid expressing PB2 (2PNP), together with  
267 the indicated NS1-GFP polypeptides. (A) Cells were processed for FISH analysis at 24 h post  
268 transfection (p.t.) using Cy3-labelled RNA probes for detection of positive sense segment 7  
269 viral RNAs (red). GFP fluorescence was also detected (green). Images were captured using a  
270 Leica-TCS confocal microscope and Leica TCS analysis software. (B) Duplicate cell samples  
271 were lysed and examined by SDS-PAGE and western blotting for GFP and tubulin. (C)  
272 Individual cells were scored according to the predominant cellular localisation of segment 7  
273 mRNA considering three phenotypes: nuclear, cytoplasmic or mixed. Values are the mean  $\pm$   
274 range from two independent experiments. A 2-way ANOVA was used to test for statistically  
275 significant differences between the values for each category from those obtained for WT-  
276 NS1 (NS, not significant; \*\*\*\*  $P < 0.0001$ ). (D) 293T cells were mock infected or infected  
277 with the indicated viruses at an M.O.I. of 5. At 6 h post infection (p.i.), cells were processed  
278 for FISH as above (red) and stained with anti-NS1 serum (green) and DAPI (for DNA; blue).  
279 Scale-bars indicate 10  $\mu\text{m}$ . Lanes 1 and 2 in panel (B) and a portion of the corresponding  
280 numerical data in panel (C) are taken with permission from Figure 4C and 4B respectively of  
281 [4].  
282

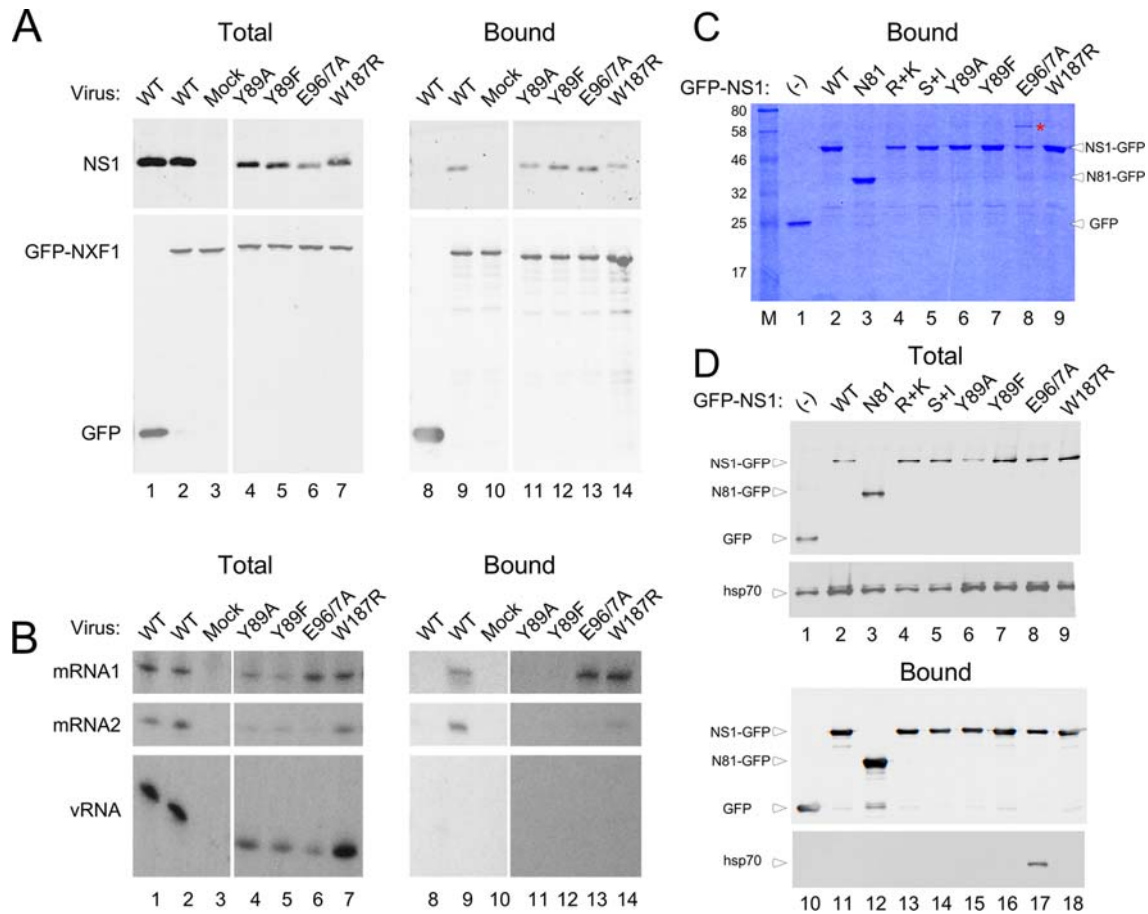

283  
284

285 **Figure 2. Interactions between NS1, cellular proteins and segment 7 mRNAs.** (A) 293T cells  
286 were transfected with plasmids encoding GFP or GFP-NXF1 and 48 h later either mock  
287 infected or infected with the indicated NS1 mutant viruses at an M.O.I. of 5. Cells were  
288 harvested at 6 h p.i. and cell lysates examined by western blotting for the indicated proteins  
289 before (Total) or after (Bound) being subjected to GFP-Trap pulldown assays. (B) 293T cells  
290 were transfected with GFP-NXF1 (GFP-NXF1 +) or with GFP alone (GFP-NXF1 -) and 48 h later  
291 either mock infected or infected with the indicated viruses at an M.O.I. of 10, in duplicate  
292 sets. At 6 h p.i., cells were harvested and total cellular RNA was extracted from one set  
293 while the second set was subjected to GFP-Trap pulldown assays prior to total RNA  
294 extraction. RNA was analysed by reverse transcription with radiolabelled primers specific for  
295 segment 7 RNAs followed by urea-PAGE and autoradiography. (C, D) 293T cells were  
296 transfected with either GFP alone or with GFP-tagged NS1 mutant protein expressing  
297 plasmids as indicated and 48 h later cells were harvested and subjected to GFP-Trap pull  
298 down assays. Eluted samples were loaded onto SDS-PAGE gels and (C) stained with  
299 Coomassie Blue dye or (D) western blotted for GFP or hsp70 before (Totals) or after (Bound)  
300 GFP-trap fractionation. Lanes 1-3 and 8-10 from panel (A) are reproduced with permission  
301 from Figure 7 of [4].  
302

303

304 **References**

305

306

307 1. Taubenberger JK, Kash JC: **Influenza virus evolution, host adaptation, and pandemic**  
308 **formation.** *Cell Host Microbe* 2010, **7**:440–451.

309 2. York A, Fodor E: **Biogenesis, assembly, and export of viral messenger ribonucleoproteins**  
310 **in the influenza A virus infected cell.** *RNA Biol* 2013, **10**:1274–1282.

311 3. Mor A, White A, Zhang K, Thompson M, Esparza M, Muñoz-Moreno R, Koide K, Lynch KW,  
312 García-Sastre A, Fontoura BMA: **Influenza virus mRNA trafficking through host nuclear**  
313 **speckles.** *Nature Microbiology* 2016, **1**:1–12.

314 4. Pereira CF, Read EKC, Wise HM, Amorim MJ, Digard P: **The influenza A virus NS1 protein**  
315 **promotes efficient nuclear export of unspliced viral M1 mRNA.** *J Virol* 2017:JVI.00528–17.

316 5. Hale BG, Randall RE, Ortín J, Jackson D: **The multifunctional NS1 protein of influenza A**  
317 **viruses.** *J Gen Virol* 2008, **89**:2359–2376.

318 6. Ayllon J, García-Sastre A, Hale BG: **Influenza A viruses and PI3K: Are there time, place**  
319 **and manner restrictions?** *Virulence* 2012, **3**:411–414.

320 7. Aramini JM, Ma L-C, Zhou L, Schauder CM, Hamilton K, Amer BR, Mack TR, Lee H-W,  
321 Ciccocanti CT, Zhao L, Xiao R, Krug RM, Montelione GT: **Dimer interface of the effector**  
322 **domain of non-structural protein 1 from influenza A virus: an interface with multiple**  
323 **functions.** *J Biol Chem* 2011, **286**:26050–26060.

324 8. Hale BG, Jackson D, Chen YH, Lamb RA, Randall RE: **Influenza A virus NS1 protein binds**  
325 **p85 $\beta$  and activates phosphatidylinositol-3-kinase signaling.** *Proc Natl Acad Sci USA* 2006,  
326 **103**:14194–14199.

327 9. Gack MU, Albrecht RA, Urano T, Inn K-S, Huang I-C, Carnero E, Farzan M, Inoue S, Jung JU,  
328 García-Sastre A: **Influenza A virus NS1 targets the ubiquitin ligase TRIM25 to evade**  
329 **recognition by the host viral RNA sensor RIG-I.** *Cell Host Microbe* 2009, **5**:439–449.

330 10. Hrinčius ER, Hennecke A-K, Gensler L, Nordhoff C, Anhlan D, Vogel P, McCullers JA,  
331 Ludwig S, Ehrhardt C: **A single point mutation (Y89F) within the non-structural protein 1 of**  
332 **influenza A viruses limits epithelial cell tropism and virulence in mice.** 2012, **180**:2361–  
333 2374.

334 11. Hale BG, Barclay WS, Randall RE, Russell RJ: **Structure of an avian influenza A virus NS1**  
335 **protein effector domain.** *Virology* 2008, **378**:1–5.

336 12. de Wit E, Spronken MIJ, Bestebroer TM, Rimmelzwaan GF, Osterhaus ADME, Fouchier  
337 RAM: **Efficient generation and growth of influenza virus A/PR/8/34 from eight cDNA**  
338 **fragments.** *Virus Res* 2004, **103**:155–161.

339 13. Shevchenko A, Tomas H, Havlis J, Olsen JV, Mann M: **In-gel digestion for mass**  
340 **spectrometric characterization of proteins and proteomes.** *Nat Protoc* 2006, **1**:2856–2860.

- 341 14. Zürcher T, Marión RM, Ortín J: **Protein synthesis shut-off induced by influenza virus**  
342 **infection is independent of PKR activity.** *Journal of Virology* 2000, **74**:8781–8784.
- 343 15. Wang W, Riedel K, Lynch P, Chien CY, Montelione GT, Krug RM: **RNA binding by the**  
344 **novel helical domain of the influenza virus NS1 protein requires its dimer structure and a**  
345 **small number of specific basic amino acids.** *RNA* 1999, **5**:195–205.
- 346 16. Kochs G, García-Sastre A, Martínez-Sobrido L: **Multiple anti-interferon actions of the**  
347 **influenza A virus NS1 protein.** 2007, **81**:7011–7021.
- 348 17. Lopes AM, Domingues P, Zell R, Hale BG: **Structure-Guided Functional Annotation of the**  
349 **Influenza A Virus NS1 Protein Reveals Dynamic Evolution of the p85 $\beta$ -Binding Site during**  
350 **Circulation in Humans.** *J Virol* 2017, **91**:e01081–17.
- 351 18. Wang W, Cui Z-Q, Han H, Zhang Z-P, Wei H-P, Zhou Y-F, Chen Z, Zhang X-E: **Imaging and**  
352 **characterizing influenza A virus mRNA transport in living cells.** *Nucleic Acids Research*  
353 2008, **36**:4913–4928.
- 354 19. Larsen S, Bui S, Perez V, Mohammad A, Medina-Ramirez H, Newcomb LL: **Influenza**  
355 **polymerase encoding mRNAs utilize atypical mRNA nuclear export.** *Virology* 2014, **11**:154.
- 356 20. Satterly N, Tsai P-L, van Deursen J, Nussenzweig DR, Wang Y, Faria PA, Levay A, Levy DE,  
357 Fontoura BMA: **Influenza virus targets the mRNA export machinery and the nuclear pore**  
358 **complex.** *PNAS* 2007, **104**:1853–1858.
- 359 21. Jackson D, Killip MJ, Galloway CS, Russell RJ, Randall RE: **Loss of function of the**  
360 **influenza A virus NS1 protein promotes apoptosis but this is not due to a failure to**  
361 **activate phosphatidylinositol 3-kinase (PI3K).** *Virology* 2010, **396**:94–105.
- 362 22. Lu X, Masic A, Li Y, Shin Y, Liu Q, Zhou Y: **The PI3K/Akt pathway inhibits influenza A**  
363 **virus-induced Bax-mediated apoptosis by negatively regulating the JNK pathway via ASK1.**  
364 *Journal of General Virology* 2010, **91**:1439–1449.
- 365 23. Ayllon J, Hale BG, Garcia-Sastre A: **Strain-Specific Contribution of NS1-Activated**  
366 **Phosphoinositide 3-Kinase Signaling to Influenza A Virus Replication and Virulence.** *Journal*  
367 *of Virology* 2012, **86**:5366–5370.
- 368 24. Rajsbaum R, Albrecht RA, Wang MK, Maharaj NP, Versteeg GA, Nistal-Villán E, García-  
369 Sastre A, Gack MU: **Species-specific inhibition of RIG-I ubiquitination and IFN induction by**  
370 **the influenza A virus NS1 protein.** *PLoS Pathog* 2012, **8**:e1003059.
- 371 25. Khaperskyy DA, Hatchette TF, McCormick C: **Influenza A virus inhibits cytoplasmic stress**  
372 **granule formation.** *FASEB J* 2012, **26**:1629–1639.
- 373 26. Liedmann S, Hrinčius ER, Guy C, Anhlan D, Dierkes R, Carter R, Wu G, Staeheli P, Green  
374 DR, Wolff T, McCullers JA, Ludwig S, Ehrhardt C: **Viral suppressors of the RIG-I-mediated**  
375 **interferon response are pre-packaged in influenza virions.** *Nat Commun* 2014, **5**:5645.
- 376 27. Moriyama M, Chen I-Y, Kawaguchi A, Koshiba T, Nagata K, Takeyama H, Hasegawa H,  
377 Ichinohe T: **The RNA- and TRIM25-Binding Domains of Influenza Virus NS1 Protein Are**

- 378 **Essential for Suppression of NLRP3 Inflammasome-Mediated Interleukin-1 $\beta$  Secretion.** *J*  
379 *Virol* 2016, **90**:4105–4114.
- 380 28. Tang Q, Wang X, Gao G: **The Short Form of the Zinc Finger Antiviral Protein Inhibits**  
381 **Influenza A Virus Protein Expression and Is Antagonized by the Virus-Encoded NS1.** *Journal*  
382 *of Virology* 2017, **91**:e01909–16.
- 383 29. Hale BG, Kerry PS, Jackson D, Precious BL, Gray A, Killip MJ, Randall RE, Russell RJ:  
384 **Structural insights into phosphoinositide 3-kinase activation by the influenza A virus NS1**  
385 **protein.** *Proc Natl Acad Sci USA* 2010, **107**:1954–1959.
- 386 30. Koliopoulos MG, Lethier M, Veen AG, Haubrich K, Hennig J, Kowalinski E, Stevens RV,  
387 Martin SR, Sousa CRE, Cusack S, Rittinger K: **Molecular mechanism of influenza A NS1-**  
388 **mediated TRIM25 recognition and inhibition.** *Nat Commun* 2018, **9**:1820.
- 389 31. Chatterjee S, Burns TF: **Targeting Heat Shock Proteins in Cancer: A Promising**  
390 **Therapeutic Approach.** *Int J Mol Sci* 2017, **18**:1978.
- 391
